# Supplementary figures and images for: Acquired Hemophilia A after SARS-CoV-2 Infection: A Case Report and an Updated Systematic Review
Source: MDPI journal article supplement (doi:10.3390/biomedicines11092400), 2023-08-28

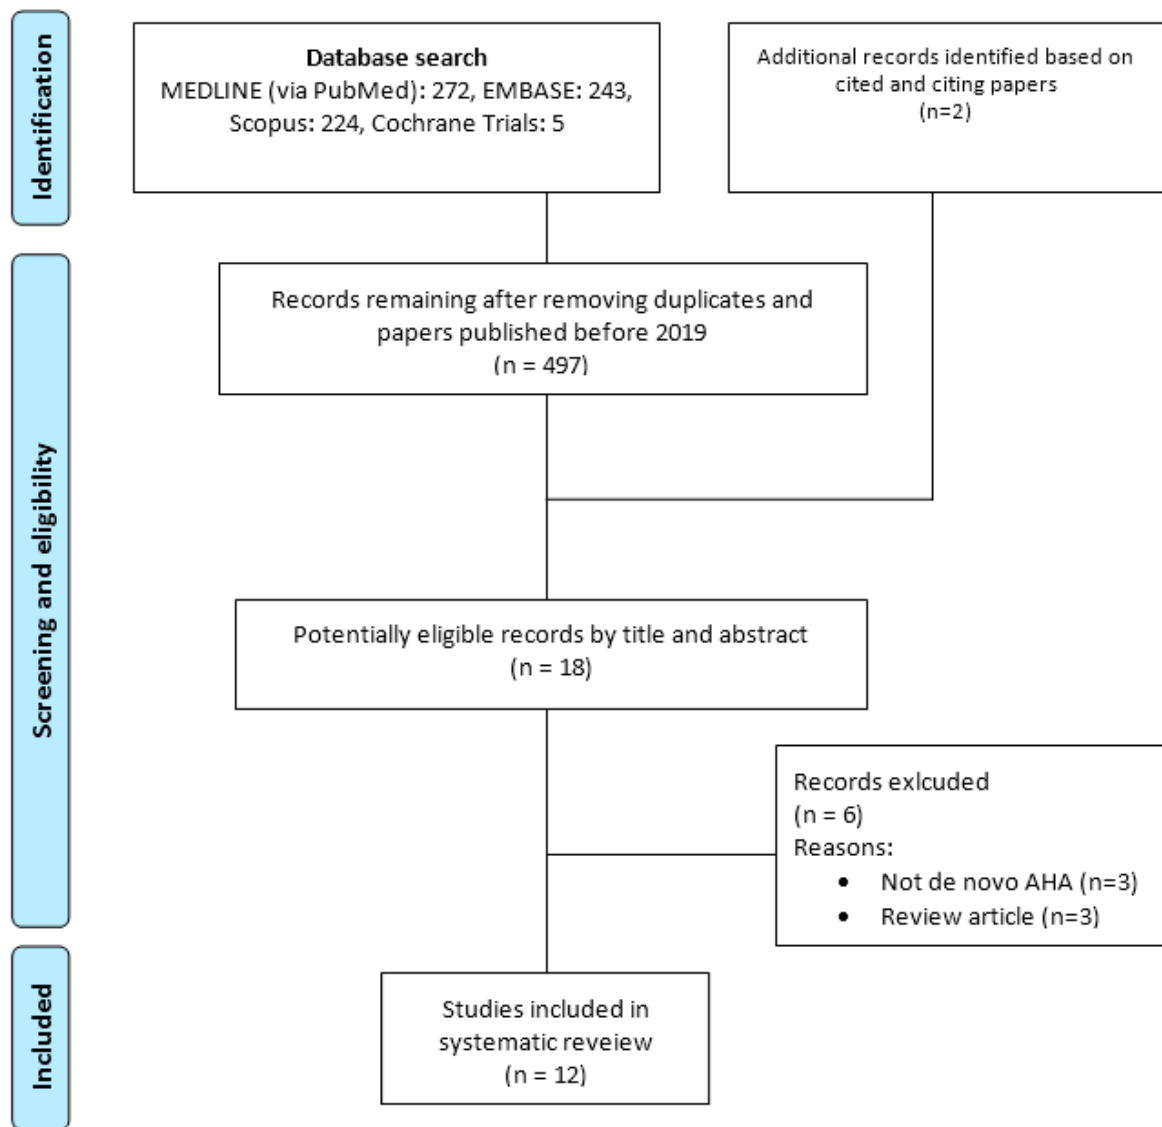

Figure S1. Flow chart of search and selection.

Supplement: s1 [file s1]
